# Supplementary material
Source: PubMed Central journal article supplement (PMC4468563)

Supp 1

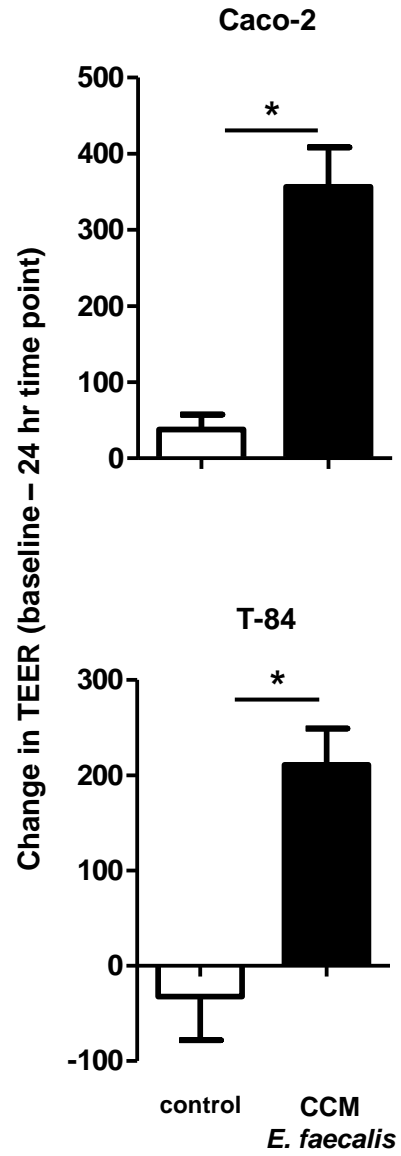

Supplement: IAI.00425-15_zii999091284so2.pdf [file IAI.00425-15_zii999091284so2.pdf]

Supp 2

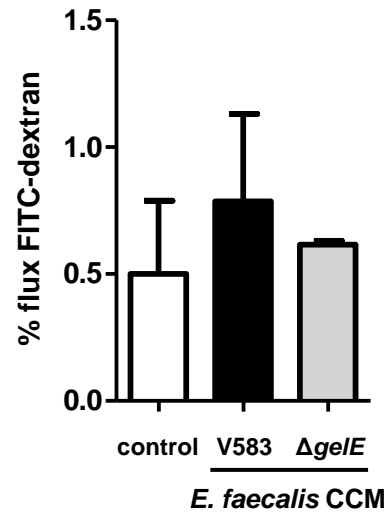

Supplement: IAI.00425-15_zii999091284so3.pdf [file IAI.00425-15_zii999091284so3.pdf]

Supp 3

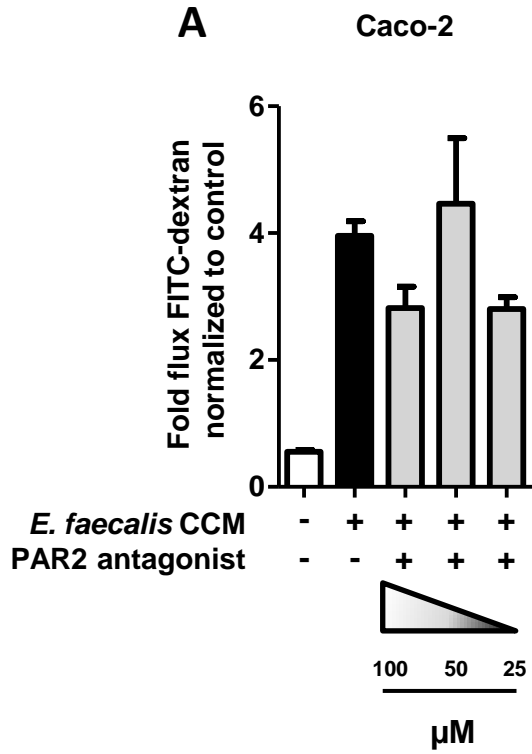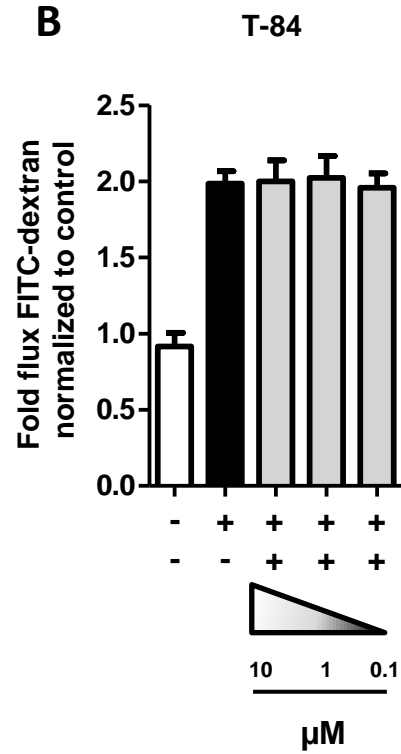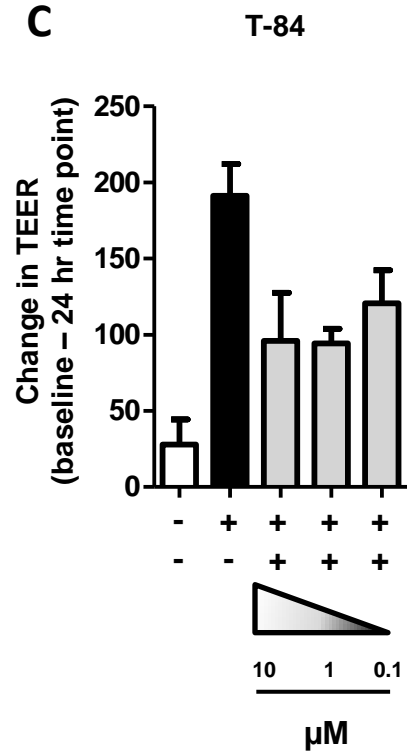

Supplement: IAI.00425-15_zii999091284so4.pdf [file IAI.00425-15_zii999091284so4.pdf]

Supp 4

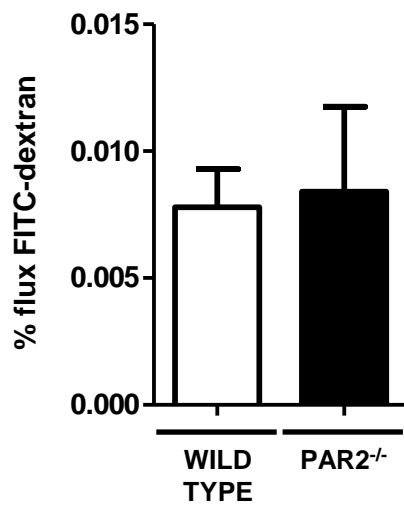

Supplement: IAI.00425-15_zii999091284so5.pdf [file IAI.00425-15_zii999091284so5.pdf]

Supp 5

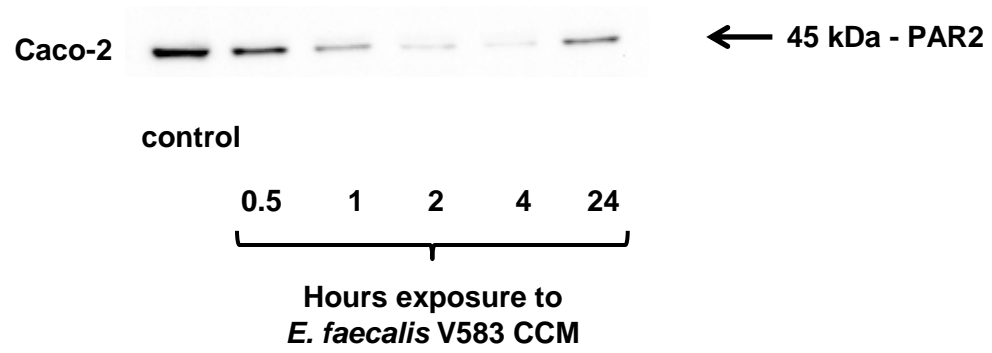

Supplement: IAI.00425-15_zii999091284so6.pdf [file IAI.00425-15_zii999091284so6.pdf]
